# Supplementary material for: Gel-type polymer separator with higher thermal stability and effective overcharge protection of 4.2 V for secondary lithium-ion batteries
Source: Royal Society of Chemistry journal article supplement (doi:10.1039/c6ra11638h), 2016-01-01
Supplement: c6ra11638h1.pdf [file c6ra11638h1.pdf]

**Electronic Supplementary Information**

---

**Gel-type Polymer Separator with Higher Thermal Stability and Effective Overcharge Protection of 4.2V for  
Secondary Lithium-ion Batteries**

Wei Ni,<sup>ab</sup> Dan Yang,<sup>ab</sup> Jianli Cheng,<sup>ab</sup> Xiaodong Li,<sup>ab</sup> Qun Guan,<sup>ab</sup> Bin Wang\*<sup>ab</sup>

<sup>a</sup> *Institute of Chemical Materials, China Academy of Engineering Physics (CAEP), Mianyang 621900, China*

<sup>b</sup> *Sichuan Research Center of New Materials, Chengdu 610200, China*

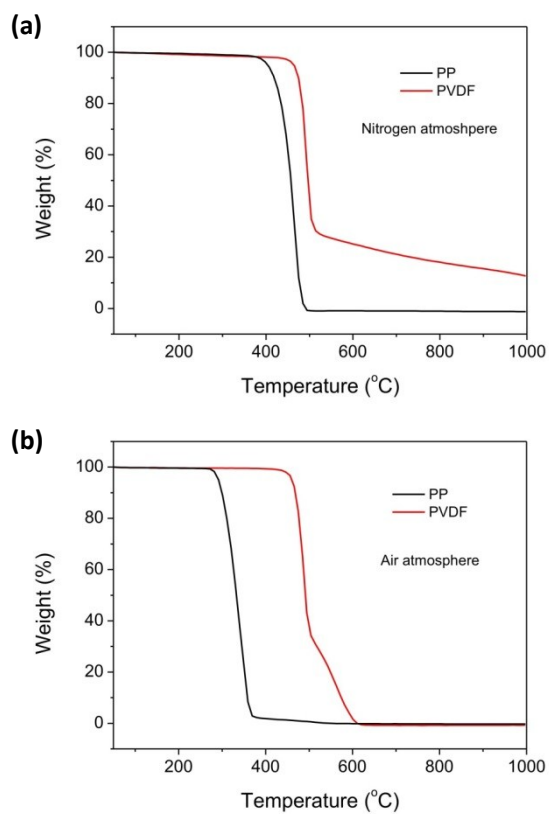

**Fig. S1** Thermogravimetric analysis of the PVDF and PP membranes in (a) nitrogen atmosphere and (b) air atmosphere.

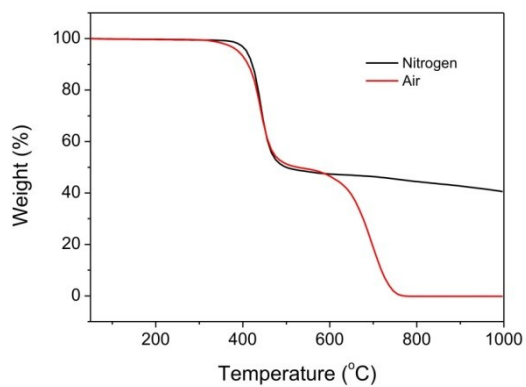

**Fig. S2** Thermogravimetric analysis of the conductive polymer PFO-PSQ in nitrogen and air atmospheres.

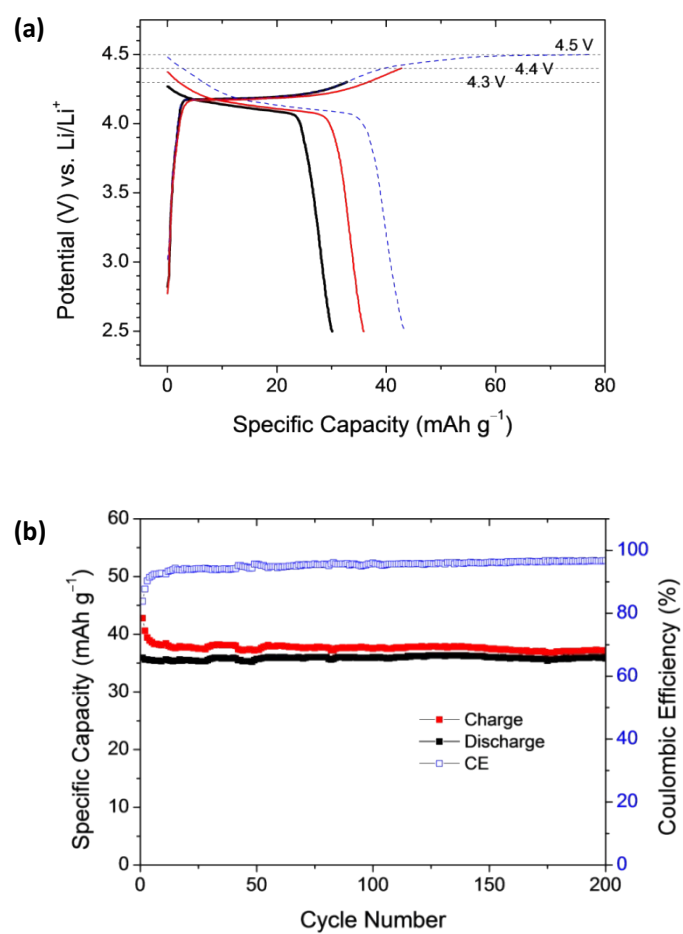

**Fig. S3** (a) Charge and discharge capacities of PFO-POSS as cathode charged to different voltages. (b) Cycling performance of PFO-POSS as cathode charged to 4.4 V.

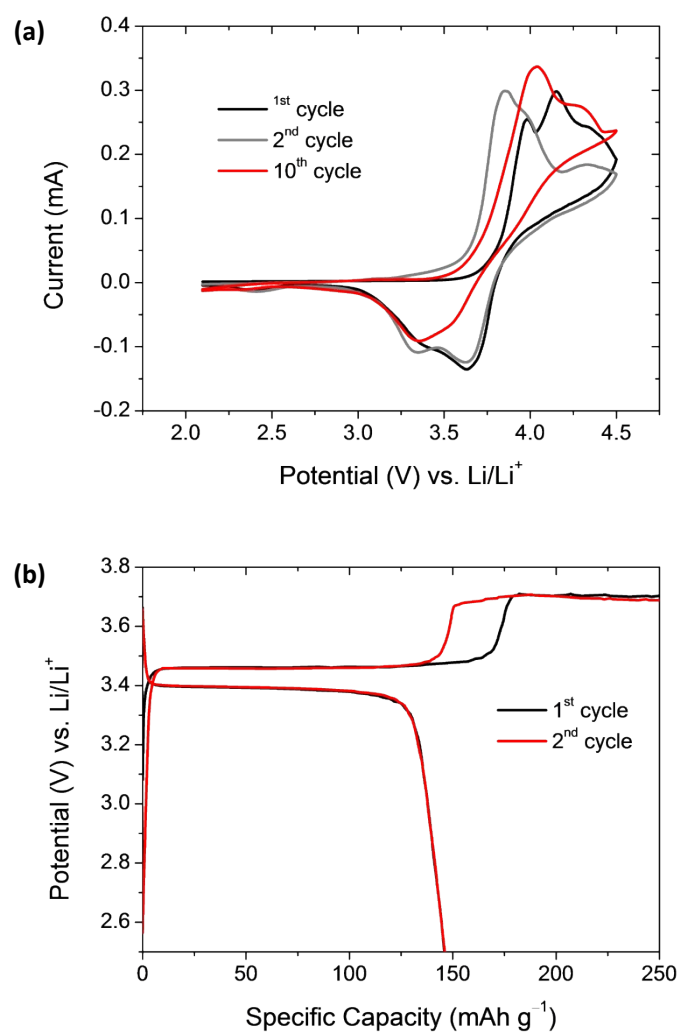

**Fig. S4** (a) CV of poly-TPD and (b) charge/discharge profiles of poly-TPD as protective separator in PVDF-based gel-type composite separator. Poly-TPD is the abbreviation of Poly[N,N'-bis(4-butylphenyl)-N,N'-bis(phenyl)-benzidine].
